# Supplementary material
Source: Springer Nature journal article supplement (https://www.springermedizin.de/resource/supplementary/12943_2010_709_MOESM12_ESM.pdf/9554632)

**A**

SNB19 TW vs SNB19 Ctrl

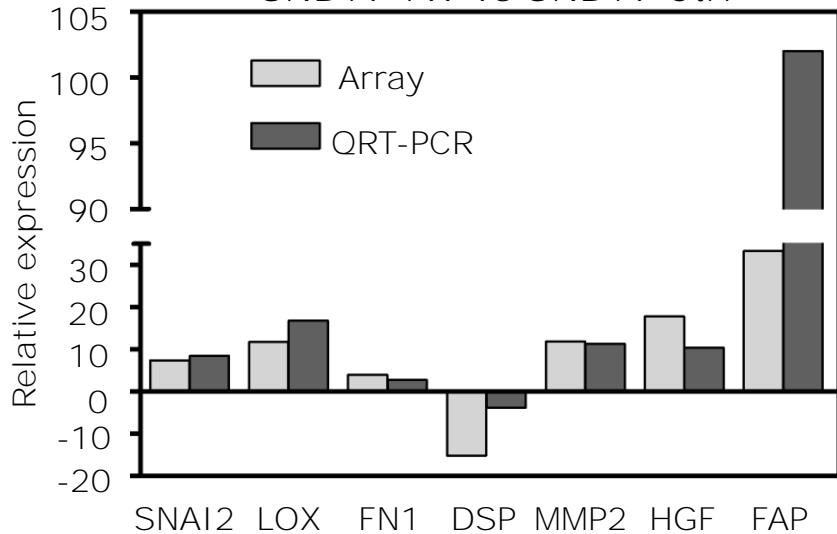**B**

T98G TW vs T98G Ctrl

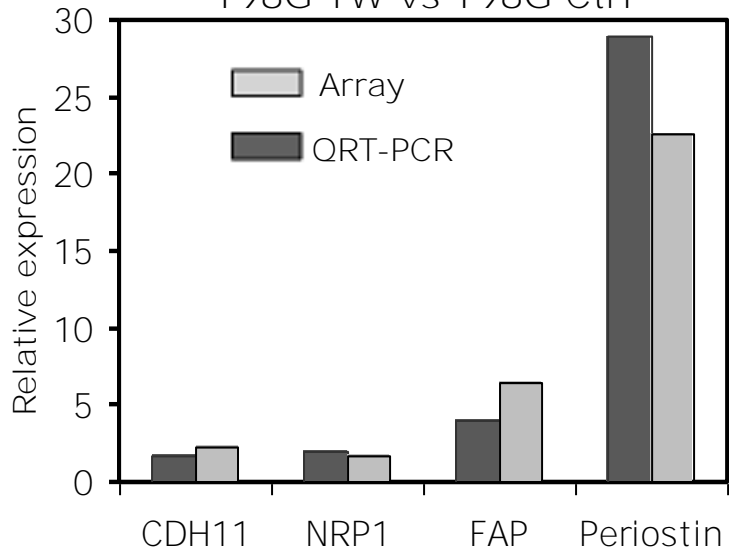

Supplement: MOESM12 [file 9554632]
